# Supplementary material for: Structural insights into the activation of somatostatin receptor 2 by cyclic SST analogues
Source: PubMed Central journal article supplement (PMC9122944; doi:10.1038/s41421-022-00405-2), 2022-05-20
Supplement: 41421_2022_405_MOESM1_ESM.pdf [file 41421_2022_405_MOESM1_ESM.pdf]

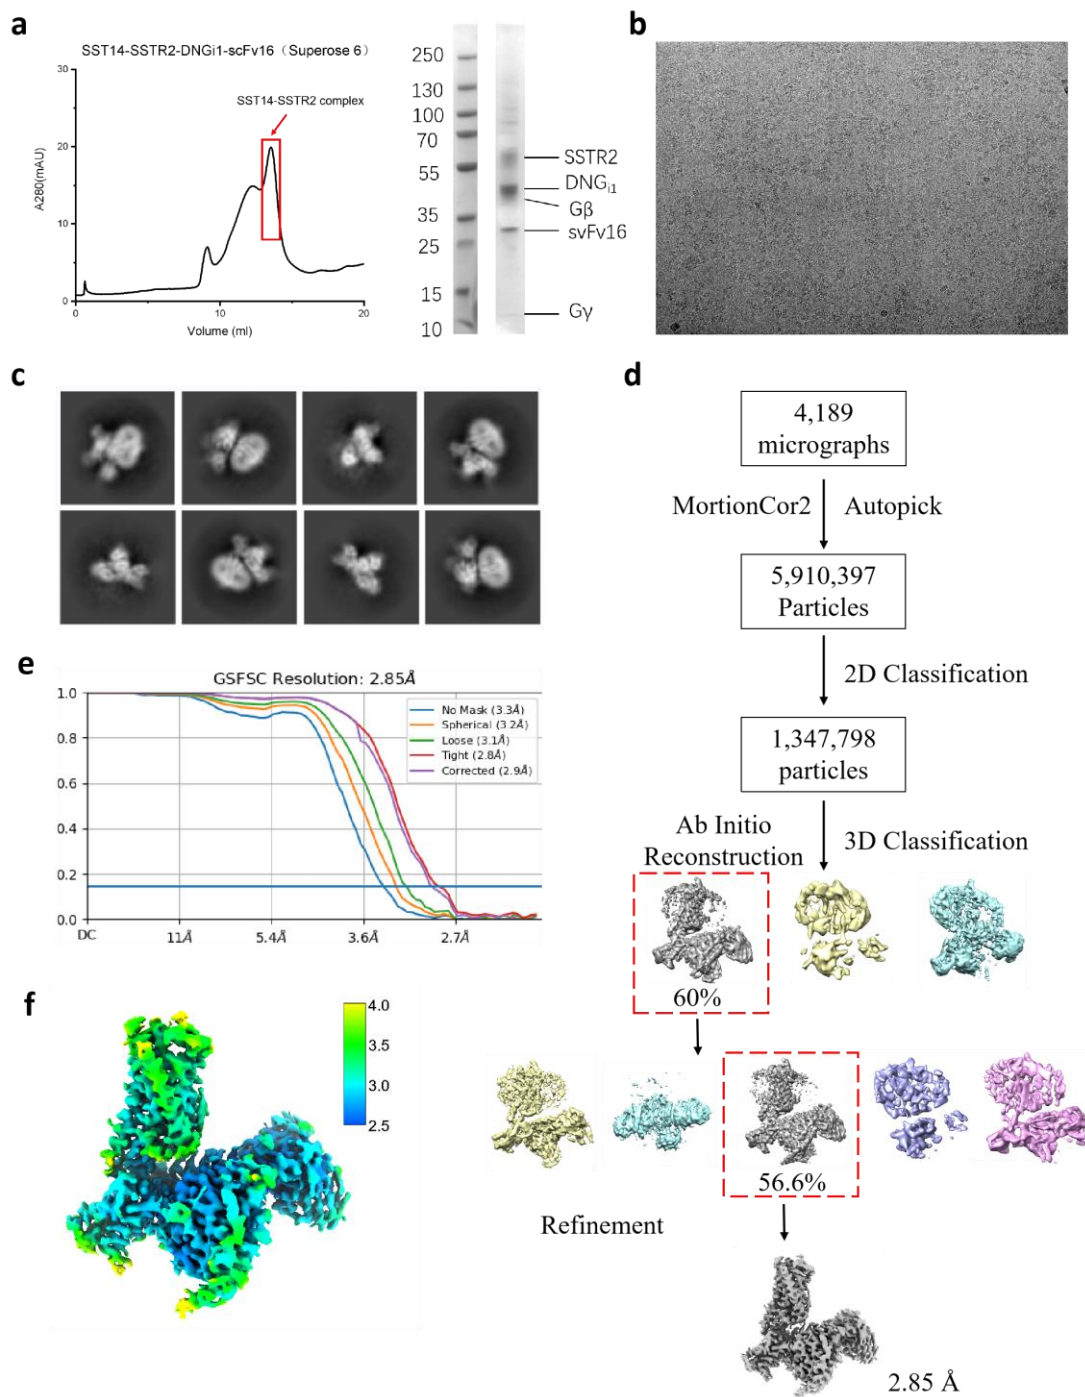

**Fig. S1 Purification and cryo-EM data processing of SST14 bound SSTR2-Gi complex.**

**a** Size-exclusion chromatography profile and SDS-PAGE analysis of SSTR2-Gi complex bound with SST14. **b** Representative micrograph after motion correction and dose weighting. **c** 2D class averages of SSTR2-Gi complex bound with SST14. **d** Flow chart of cryo-EM data processing using cryoSPARC. **e** Gold-standard FSC validation curves from cryoSPARC. **f** Density map of SSTR2-Gi/SST14 complex colored by local resolution estimation.

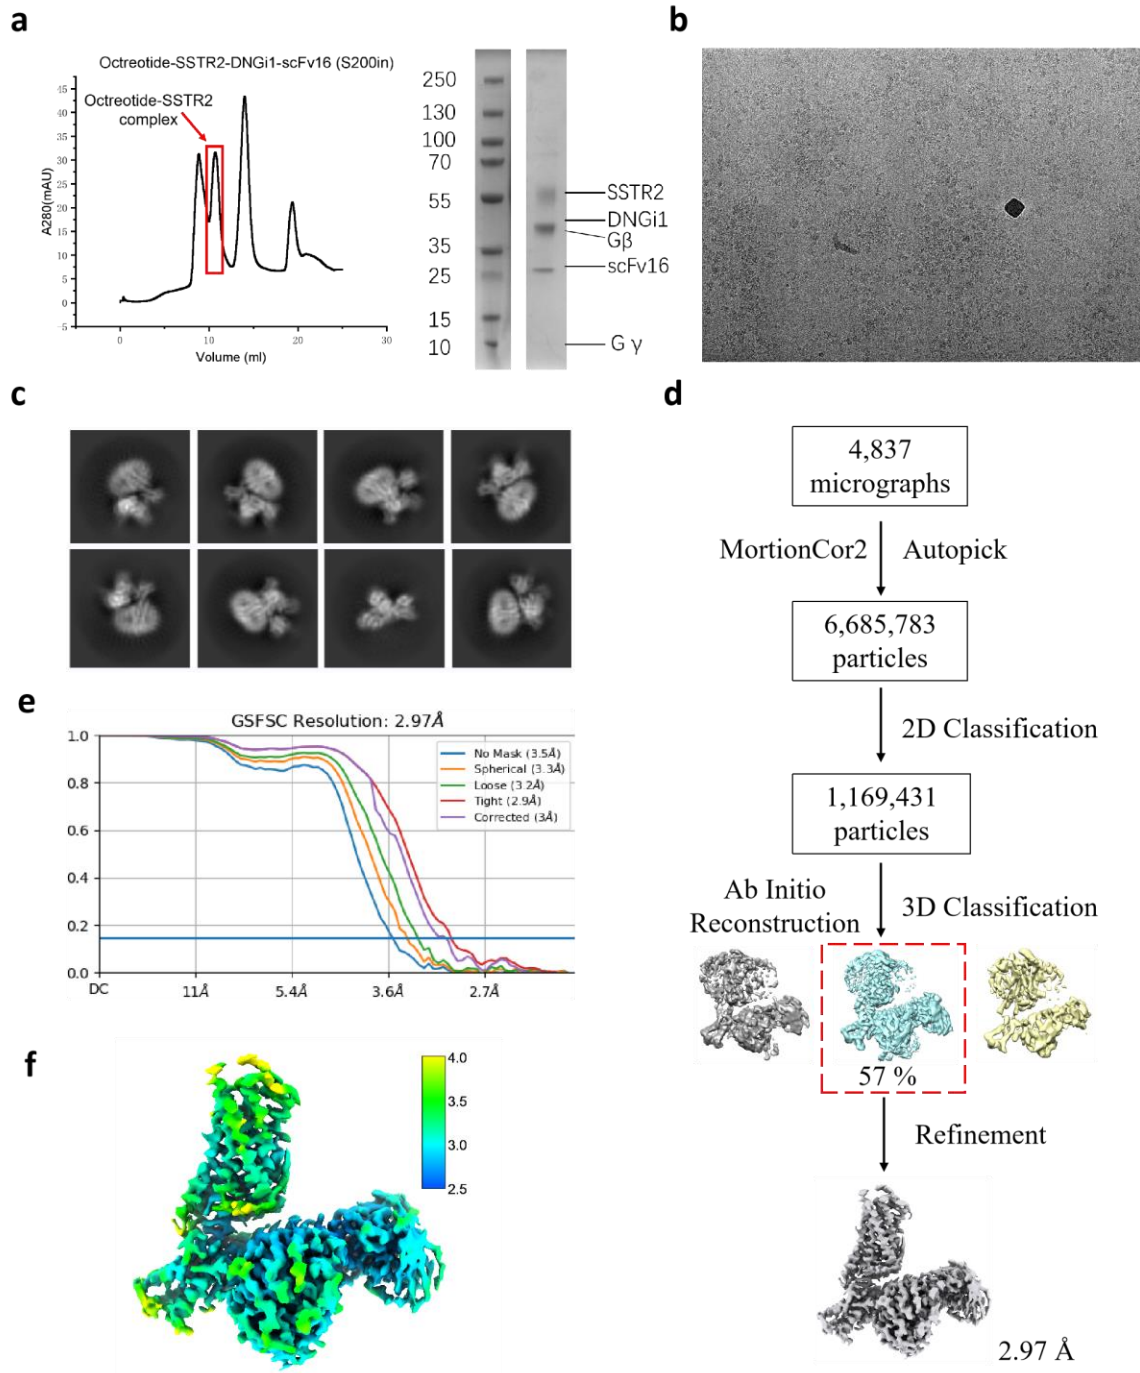

**Fig. S2 Purification and cryo-EM data processing of octreotide bound SSTR2-Gi complex.**

**a** Size-exclusion chromatography profile and SDS-PAGE analysis of SSTR2-Gi complex bound with octreotide. **b** Representative micrograph after motion correction and dose weighting. **c** 2D class averages of SSTR2-Gi complex bound with octreotide. **d** Flow chart of cryo-EM data processing using cryoSPARC. **e** Gold-standard FSC validation curves from cryoSPARC. **f** Density map of SSTR2-Gi/octreotide complex colored by local resolution estimation.

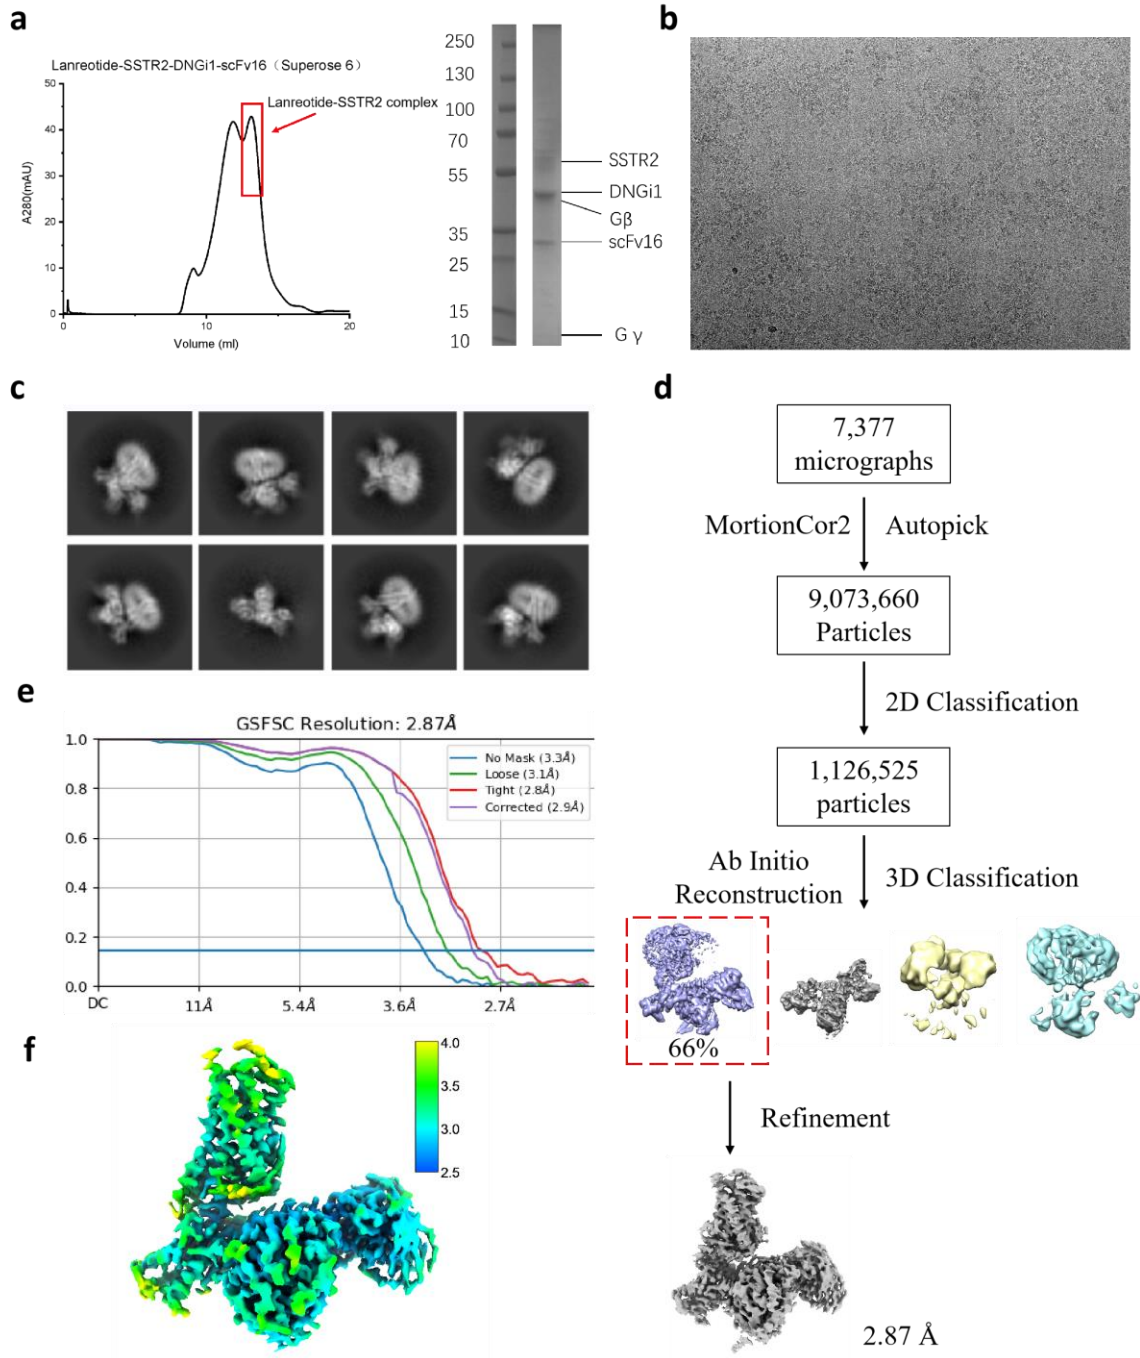

**Fig. S3 Purification and cryo-EM data processing of lanreotide bound SSTR2-Gi complex.**

**a** Size-exclusion chromatography profile and SDS-PAGE analysis of SSTR2-Gi complex bound with lanreotide. **b** Representative micrograph after motion correction and dose weighting. **c** 2D class averages of SSTR2-Gi complex bound with lanreotide. **d** Flow chart of cryo-EM data processing using cryoSPARC. **e** Gold-standard FSC validation curves from cryoSPARC. **f** Density map of SSTR2-Gi/lanreotide complex colored by local resolution estimation.



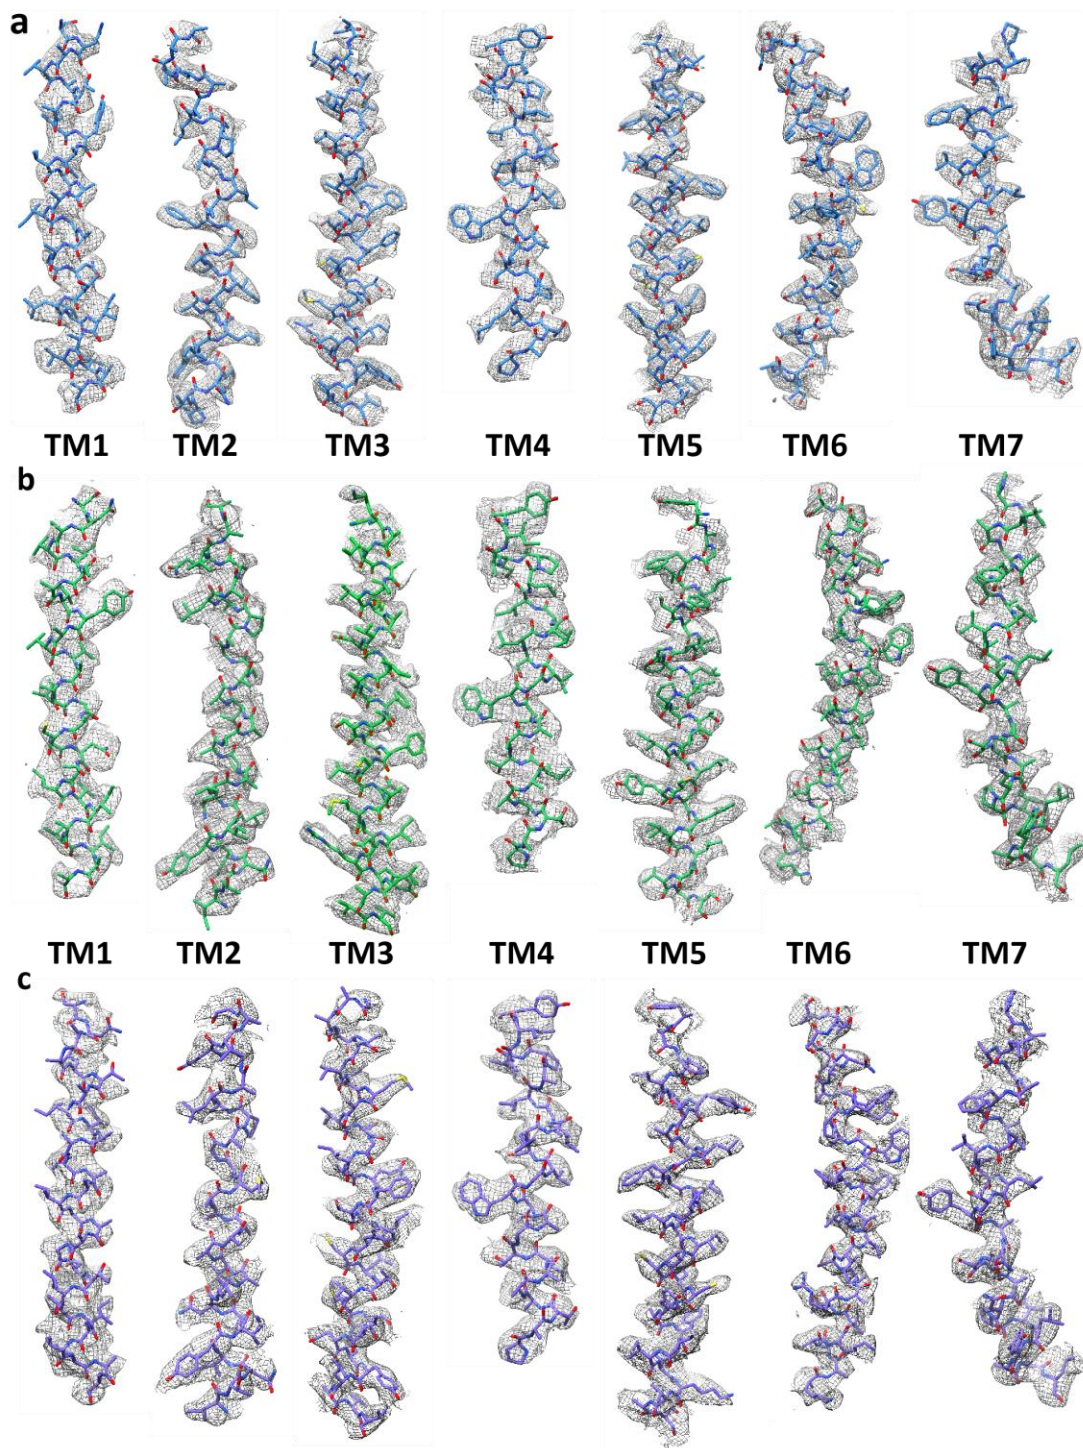

**Fig. S4 Cryo-EM densities of representative segments of SSTR2-Gi complex.**

**a-c** Cryo-EM density maps and models of transmembrane domain of SSTR2-Gi/SST14 complex(**a**), SSTR2-Gi/octreotide(**b**) and SSTR2-Gi/lanreotide complex(**c**). The cryo-EM maps are shown in mesh and molecular models as stick representation.

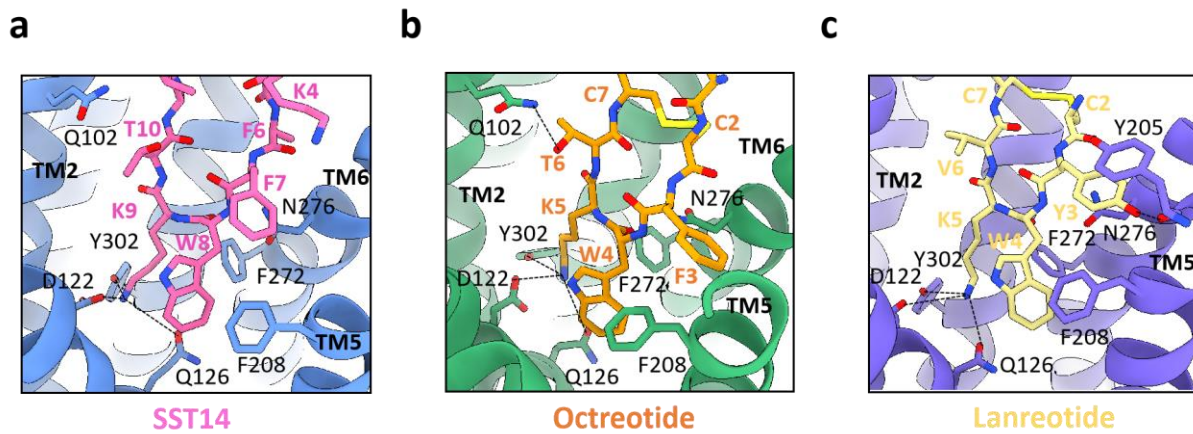

**Fig. S5 The ligand binding pockets of SSTR2 bound with SST14, Octreotide or Lanreotide.**

Side views of the orthosteric binding pockets in the SST14-bound SSTR2(a), ortreotide-bound SSTR2(b) and lanreotide-bound SSTR2(c) structures. Residues within 4 Å of both ligands are shown as sticks and the hydrogen bond interactions are represented by dotted lines. In both panels, red and blue sticks represent oxygen and nitrogen, respectively.

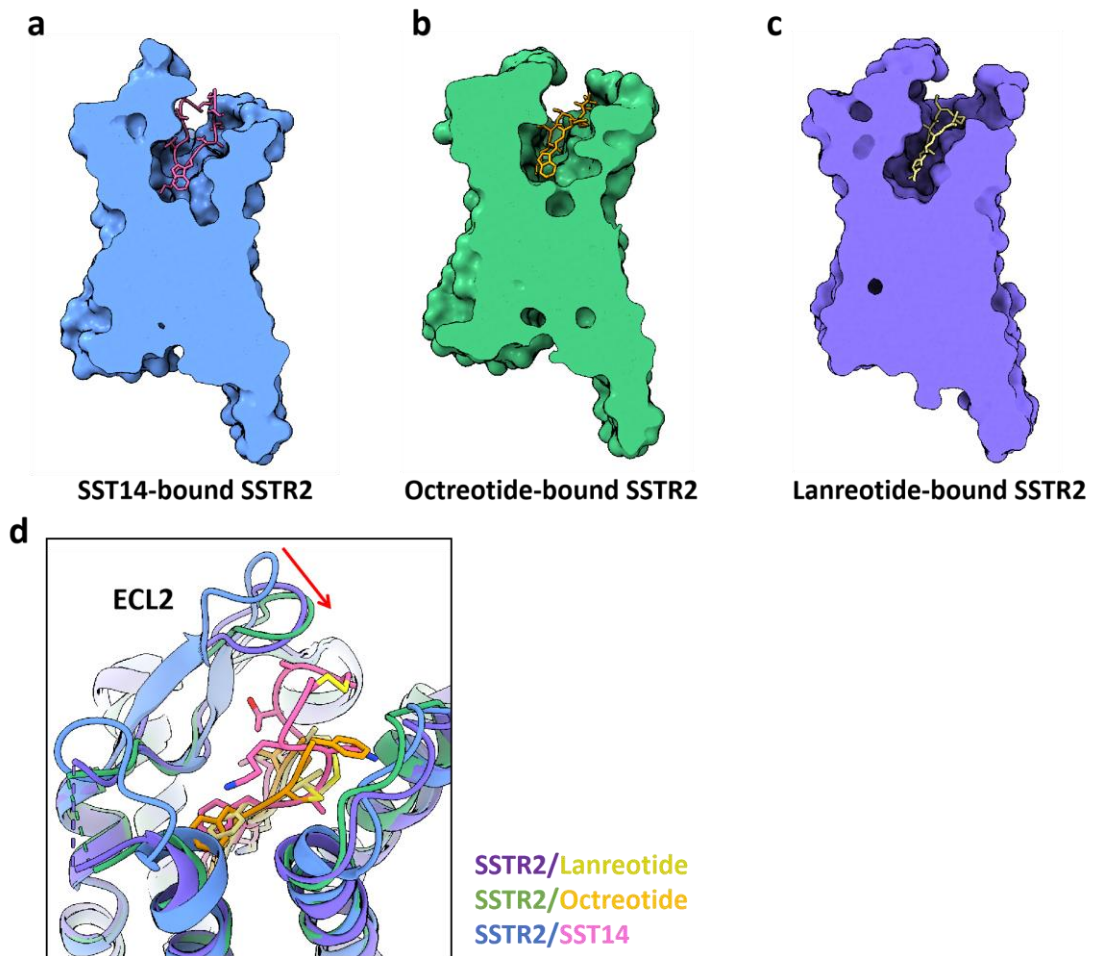

**Fig. S6** The conformational change of ECL2 led to the difference between lanreotide, ortreotide and SST14 binding pockets.

**a-c** Space-filling models and cross-section views of SST14-bound SSTR2(**a**), ortreotide-bound SSTR2(**b**) and lanreotide-bound SSTR2(**c**).

**d** Comparison of ECL2 of lanreotide or ortreotide or SST14 bound SSTR2.

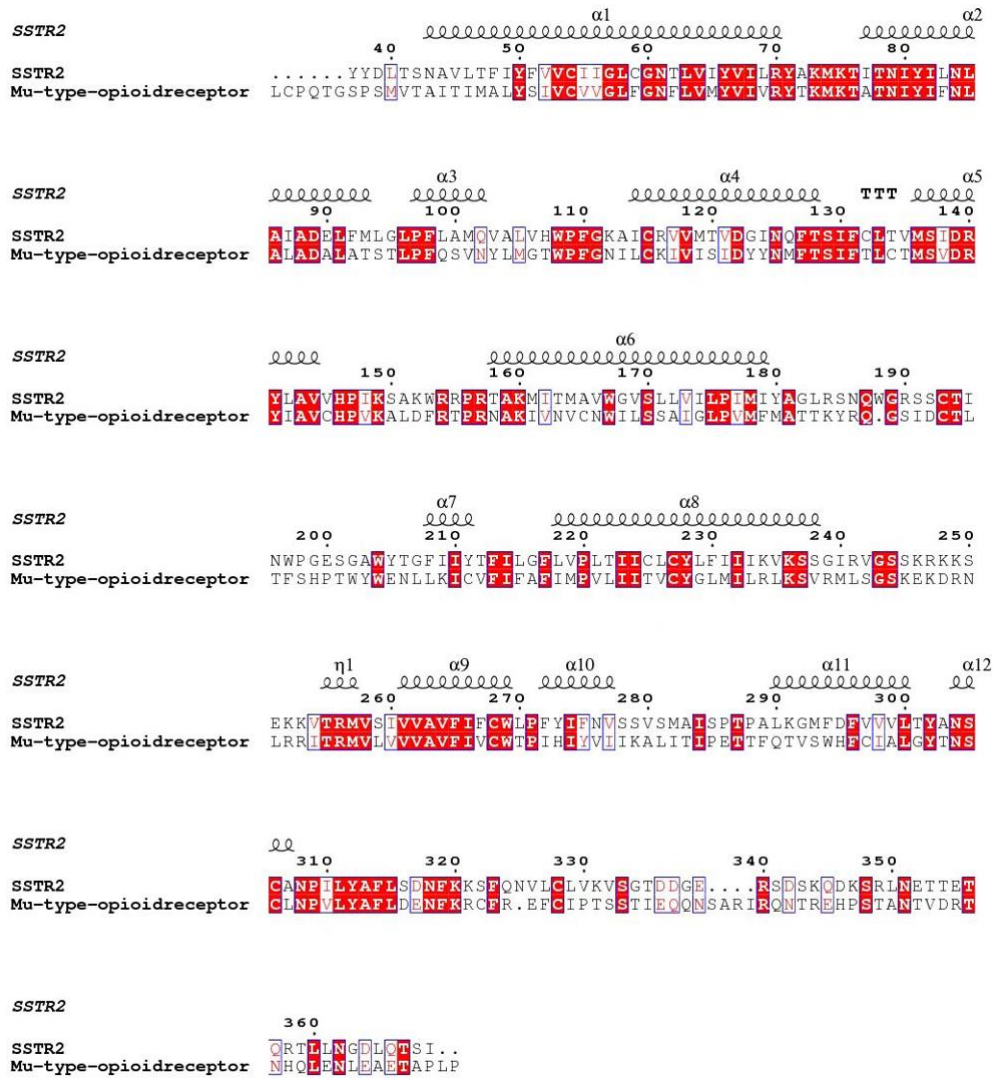

Fig. S7 Sequence alignment of SSTR2 and  $\mu$ -opioid receptor.



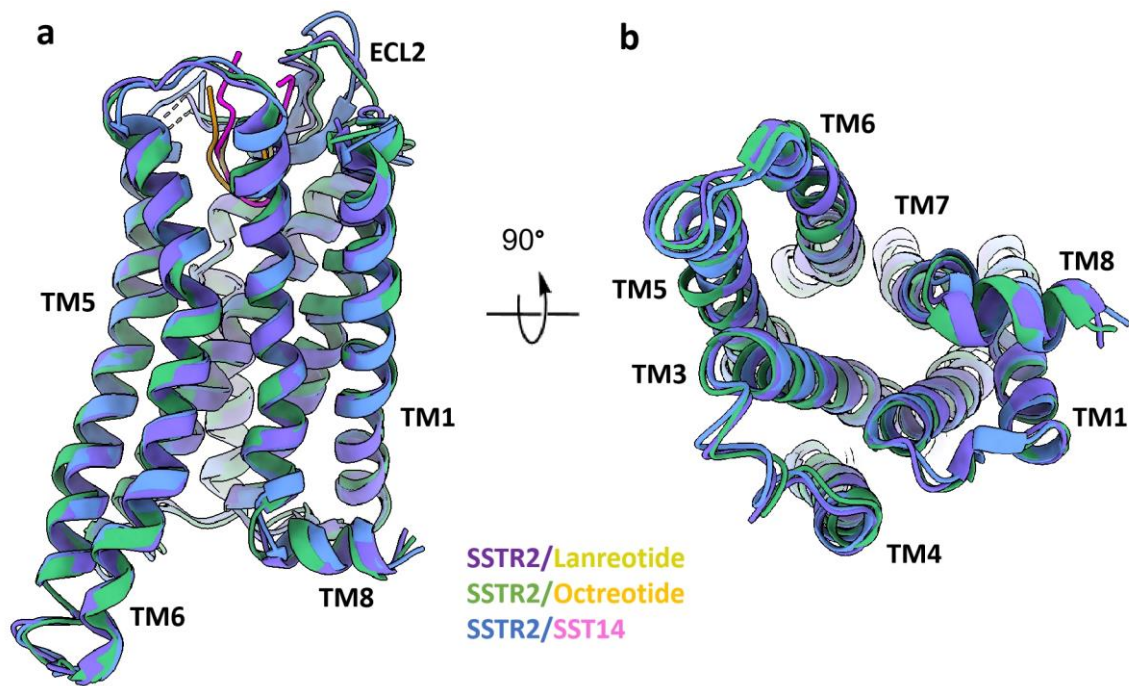

**Fig. S8 Conformational comparison of SSTR2 upon activation by different ligands.**

Side (a) and top (b) views of alignment of active SST14-bound SSTR2 (blue), ortreotide-bound SSTR2(green) and lanreotide-bound SSTR2(purple).



**Table S1 | Statistics of cryo-EM data collection, 3D reconstruction and model refinement.**

| <b>Data Collection</b>                             |                 |                 |                 |
|----------------------------------------------------|-----------------|-----------------|-----------------|
| <b>Protein</b>                                     | SSTR2/SST14     | SSTR2/OCT       | SSTR2/LAN       |
| <b>Microscope</b>                                  | FEI Titan Krios | FEI Titan Krios | FEI Titan Krios |
| <b>Voltage (kV)</b>                                | 300             | 300             | 300             |
| <b>Detector</b>                                    | Gatan K3 Summit | Gatan K3 Summit | Gatan K3 Summit |
| <b>Detector mode</b>                               | Super           | Super           | Super           |
| <b>Pixel size (Å)</b>                              | 0.535           | 0.535           | 0.535           |
| <b>Defocus range (µm)</b>                          | -1.2 ~ -2.2     | -1.2 ~ -2.2     | -1.2 ~ -2.2     |
| <b>Electron dose (e<sup>-</sup>/Å<sup>2</sup>)</b> | 55              | 55              | 55              |
| <b>Frames per image</b>                            | 30              | 30              | 30              |
| <b>Exposure time (s)</b>                           | 3.5             | 3.5             | 3.5             |
| <b>Number of images</b>                            | 4,189           | 4,837           | 7,377           |
| <b>3D reconstruction</b>                           |                 |                 |                 |
| <b>Final Particle number</b>                       | 457,712         | 666,575         | 743,506         |
| <b>Symmetry</b>                                    | C1              | C1              | C1              |
| <b>Overall resolution (Å)</b>                      | 2.85            | 2.97            | 2.87            |
| <b>Model refinement</b>                            |                 |                 |                 |
| <b>Model composition</b>                           |                 |                 |                 |
| <b>Chains</b>                                      | 6               | 6               | 6               |
| <b>Ligands</b>                                     | DTR:1           | DTR:1           | DTR:1           |
| <b>Non-hydrogen atoms</b>                          | 8,440           | 8,443           | 8,410           |
| <b>Protein residues</b>                            | 1,152           | 1,189           | 1,140           |
| <b>Bonds (RMSD)</b>                                |                 |                 |                 |
| <b>Length (Å)</b>                                  | 0.014           | 0.011           | 0.009           |
| <b>Angles (°)</b>                                  | 1.252           | 1.189           | 1.051           |

**Ramachandran plot (%)**

|                             |       |       |       |
|-----------------------------|-------|-------|-------|
| <b>Outliers</b>             | 0.09  | 0.00  | 0.00  |
| <b>Allowed</b>              | 7.23  | 8.12  | 8.30  |
| <b>Favored</b>              | 92.68 | 91.88 | 91.70 |
| <b>Rotamer outliers (%)</b> | 0.83  | 1.17  | 0.71  |
| <b>MolProbity score</b>     | 1.81  | 1.94  | 1.93  |
| <b>Clash score</b>          | 6.35  | 7.24  | 7.84  |

---

**Table S2 | Summary of EC50 values, Emax for the wild-type SSTR2 and SST22 mutants activation by SST14, Octreotide and Lanreotide.** pEC50 values represent the negative logarithm of agonist concentration that produces half maximal response. Emax values are maximal response as percentage of wild-type SSTR2 response. All values are expressed as mean  $\pm$  s.e.m. of three independent experiments conducted in triplicate. Data were performed using one-way analysis of variance followed by Dunnett's test using wild-type receptors as the control (\*P < 0.05, \*\*P < 0.01, \*\*\*P < 0.001, \*\*\*\*P < 0.0001). n.d., not determined.

|                           | Ligand     | Ca <sup>2+</sup><br>pEC <sub>50</sub> | Ca <sup>2+</sup><br>Emax        | Surface<br>expression<br>(%WT) |
|---------------------------|------------|---------------------------------------|---------------------------------|--------------------------------|
| SSTR2<br>WT               | Octreotide | 7.7 $\pm$ 0.04, (22)                  | /                               | 100                            |
|                           | SST14      | 8.0 $\pm$ 0.1, (20)                   | /                               |                                |
|                           | Lanreotide | 7.3 $\pm$ 0.05, (10)                  | /                               |                                |
| SSTR2(1-359)-<br>Largebit | Octreotide | 7.5 $\pm$ 0.1, (3)                    | 82.6 $\pm$ 7.4 <sup>**</sup>    | 113.5 $\pm$ 7.1                |
|                           | SST14      | 7.9 $\pm$ 0.1, (3)                    | 77.8 $\pm$ 6.1 <sup>****</sup>  |                                |
|                           | Lanreotide | 7.2 $\pm$ 0.1, (3)                    | 101.8 $\pm$ 9.1                 |                                |
| Q102A                     | Octreotide | 5.9 $\pm$ 0.2, (3) <sup>****</sup>    | 103.8 $\pm$ 12.1                | 47.1 $\pm$ 1.7                 |
|                           | SST14      | 7.2 $\pm$ 0.2, (3) <sup>*</sup>       | 95.3 $\pm$ 6.0                  |                                |
|                           | Lanreotide | 6.4 $\pm$ 0.1, (3) <sup>****</sup>    | 56.1 $\pm$ 4.2 <sup>****</sup>  |                                |
| D122A                     | Octreotide | n.d. (3)                              | 5.6 $\pm$ 0.5 <sup>****</sup>   | 114.3 $\pm$ 12.2               |
|                           | SST14      | n.d. (3)                              | 6.2 $\pm$ 0.3 <sup>****</sup>   |                                |
|                           | Lanreotide | n.d. (3)                              | 11.7 $\pm$ 4.3 <sup>****</sup>  |                                |
| Q126A                     | Octreotide | 7.0 $\pm$ 0.1, (3) <sup>****</sup>    | 83.5 $\pm$ 5.9 <sup>*</sup>     | 35.9 $\pm$ 1.3                 |
|                           | SST14      | 7.0 $\pm$ 0.1, (3) <sup>**</sup>      | 92.9 $\pm$ 8.1                  |                                |
|                           | Lanreotide | n.d. (3)                              | 25.2 $\pm$ 1.8 <sup>****</sup>  |                                |
| F272A                     | Octreotide | n.d. (3)                              | n.d.                            | 55.5 $\pm$ 6.5                 |
|                           | SST14      | n.d. (3)                              | n.d.                            |                                |
|                           | Lanreotide | n.d. (3)                              | 12.38 $\pm$ 1.1 <sup>****</sup> |                                |
| F208A                     | Octreotide | 5.9 $\pm$ 0.1, (3) <sup>****</sup>    | 98.7 $\pm$ 6.9                  | 68.6 $\pm$ 8.5                 |
|                           | SST14      | 6.8 $\pm$ 0.1, (3) <sup>***</sup>     | 97.9 $\pm$ 3.6                  |                                |
|                           | Lanreotide | n.d. (3)                              | 27.9 $\pm$ 4.0 <sup>****</sup>  |                                |
| N276A                     | Octreotide | n.d. (3)                              | 22.3 $\pm$ 5.4 <sup>****</sup>  | 52.7 $\pm$ 5.7                 |
|                           | SST14      | 6.4 $\pm$ 0.1, (3) <sup>****</sup>    | 67.7 $\pm$ 2.4 <sup>****</sup>  |                                |
|                           | Lanreotide | n.d. (3)                              | 13.8 $\pm$ 1.6 <sup>****</sup>  |                                |
| Y302A                     | Octreotide | n.d. (3)                              | 13.7 $\pm$ 3.2 <sup>****</sup>  | 37.2 $\pm$ 3.5                 |
|                           | SST14      | n.d. (3)                              | 28.3 $\pm$ 4.4 <sup>****</sup>  |                                |
|                           | Lanreotide | n.d. (3)                              | 14.0 $\pm$ 2.2 <sup>****</sup>  |                                |
| Q102S                     | Octreotide | 5.9 $\pm$ 0.1, (3) <sup>****</sup>    | 91.9 $\pm$ 6.5                  | 80.1 $\pm$ 2.1                 |
|                           | Lanreotide | 6.3 $\pm$ 0.1, (3) <sup>****</sup>    | 54.8 $\pm$ 1.6 <sup>****</sup>  |                                |
| F294S                     | Octreotide | n.d. (3)                              | n.d.                            | 192.5 $\pm$ 5.3                |
|                           | Lanreotide | n.d. (3)                              | 11.45 $\pm$ 0.8 <sup>****</sup> |                                |

|       |            |          |                                |               |
|-------|------------|----------|--------------------------------|---------------|
| N276Q | Octreotide | n.d. (3) | $17.9 \pm 2.9$ <sup>****</sup> | $4.0 \pm 0.3$ |
|       | Lanreotide | n.d. (3) | $17.0 \pm 2.6$ <sup>****</sup> |               |
